# Supplementary material
Source: PubMed Central journal article supplement (PMC8053973)
Supplement: pnas.2013535118.sd03.pdf [file pnas.2013535118.sd03.pdf]

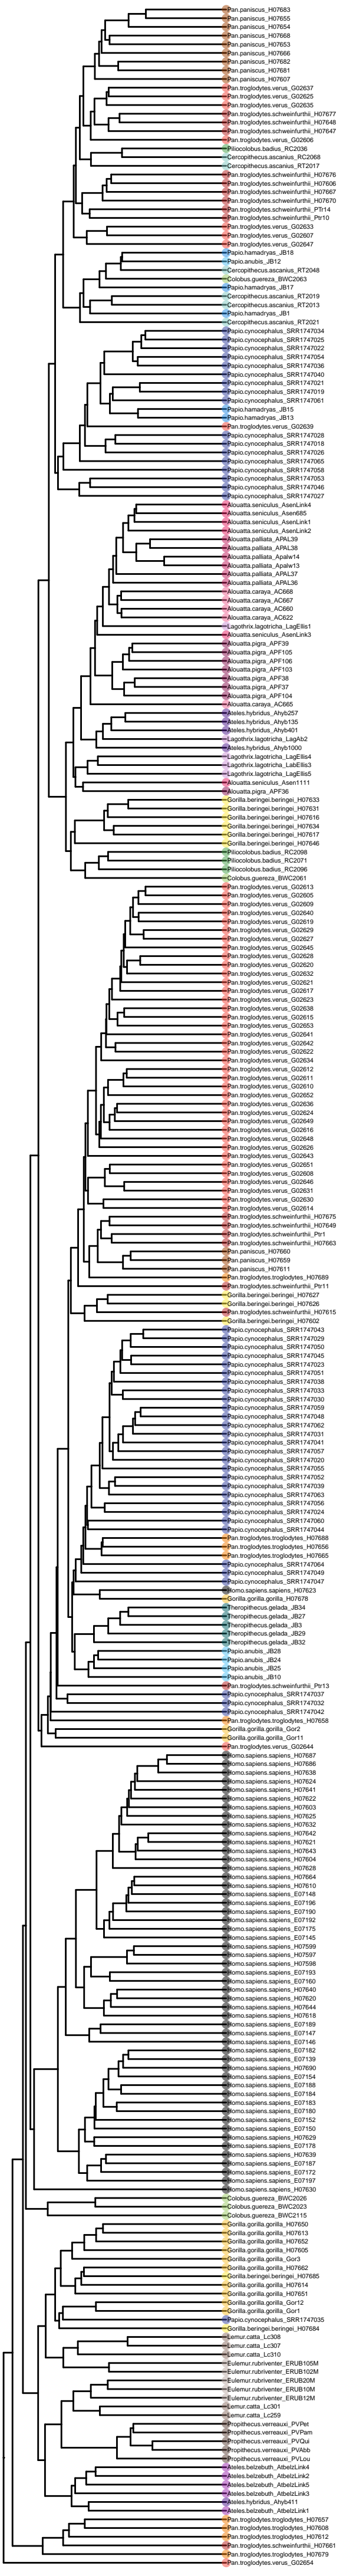

Pan paniscus\_H07683  
Pan paniscus\_H07655  
Pan paniscus\_H07654  
Pan paniscus\_H07668  
Pan paniscus\_H07653  
Pan paniscus\_H07666  
Pan paniscus\_H07682  
Pan paniscus\_H07681  
Pan paniscus\_H07607  
Pan troglodytes.verus\_G02637  
Pan troglodytes.verus\_G02625  
Pan troglodytes.verus\_G02635  
Pan troglodytes.schweinfurthi\_H07677  
Pan troglodytes.schweinfurthi\_H07648  
Pan troglodytes.schweinfurthi\_H07647  
Pan troglodytes.verus\_G02626  
Ptilocolobus.badius\_RC2036  
Cercopithecus.ascanius\_RC2068  
Cercopithecus.ascanius\_RT2017  
Pan troglodytes.schweinfurthi\_H07676  
Pan troglodytes.schweinfurthi\_H07606  
Pan troglodytes.schweinfurthi\_H07667  
Pan troglodytes.schweinfurthi\_H07670  
Pan troglodytes.schweinfurthi\_Pt114  
Pan troglodytes.schweinfurthi\_Pt110  
Pan troglodytes.verus\_G02633  
Pan troglodytes.verus\_G02607  
Pan troglodytes.verus\_G02647  
Papio.hamadryas\_JB18  
Papio.arubis\_JB12  
Cercopithecus.ascanius\_RT2048  
Colobus.guereza\_BWC2063  
Papio.hamadryas\_JB17  
Cercopithecus.ascanius\_RT2019  
Cercopithecus.ascanius\_RT2013  
Papio.hamadryas\_JB1  
Cercopithecus.ascanius\_RT2021  
Papio.cynocephalus\_SRR1747034  
Papio.cynocephalus\_SRR1747025  
Papio.cynocephalus\_SRR1747022  
Papio.cynocephalus\_SRR1747054  
Papio.cynocephalus\_SRR1747036  
Papio.cynocephalus\_SRR1747040  
Papio.cynocephalus\_SRR1747021  
Papio.cynocephalus\_SRR1747019  
Papio.cynocephalus\_SRR1747061  
Papio.hamadryas\_JB15  
Pan troglodytes.verus\_G02639  
Papio.cynocephalus\_SRR1747028  
Papio.cynocephalus\_SRR1747018  
Papio.cynocephalus\_SRR1747026  
Papio.cynocephalus\_SRR1747065  
Papio.cynocephalus\_SRR1747058  
Papio.cynocephalus\_SRR1747053  
Papio.cynocephalus\_SRR1747046  
Papio.cynocephalus\_SRR1747027  
Alouatta.seneculus\_AsenLink4  
Alouatta.seneculus\_Asen685  
Alouatta.seneculus\_AsenLink1  
Alouatta.seneculus\_AsenLink2  
Alouatta.palliata\_APAL39  
Alouatta.palliata\_APAL38  
Alouatta.palliata\_Apalw14  
Alouatta.palliata\_Apalw13  
Alouatta.palliata\_APAL37  
Alouatta.palliata\_APAL36  
Alouatta.caraya\_AC669  
Alouatta.caraya\_AC667  
Alouatta.caraya\_AC660  
Alouatta.caraya\_AC622  
Lagothrix.lagothrix\_LagEllis1  
Alouatta.seneculus\_AsenLink3  
Alouatta.pigra\_APF38  
Alouatta.pigra\_APF105  
Alouatta.pigra\_APF106  
Alouatta.pigra\_APF103  
Alouatta.pigra\_APF38  
Alouatta.pigra\_APF37  
Alouatta.pigra\_APF104  
Alouatta.caraya\_AC665  
Ateles.hybridus\_Ahyb257  
Ateles.hybridus\_Ahyb135  
Ateles.hybridus\_Ahyb401  
Lagothrix.lagothrix\_LagAb2  
Ateles.hybridus\_Ahyb1000  
Lagothrix.lagothrix\_LagEllis4  
Lagothrix.lagothrix\_LagEllis3  
Lagothrix.lagothrix\_LagEllis5  
Alouatta.seneculus\_Asen1111  
Alouatta.pigra\_APF36  
Gorilla.beringel.beringel\_H07633  
Gorilla.beringel.beringel\_H07631  
Gorilla.beringel.beringel\_H07616  
Gorilla.beringel.beringel\_H07634  
Gorilla.beringel.beringel\_H07617  
Gorilla.beringel.beringel\_H07646  
Ptilocolobus.badius\_RC2098  
Ptilocolobus.badius\_RC2071  
Ptilocolobus.badius\_RC2096  
Colobus.guereza\_BWC2061  
Pan troglodytes.verus\_G02613  
Pan troglodytes.verus\_G02605  
Pan troglodytes.verus\_G02609  
Pan troglodytes.verus\_G02640  
Pan troglodytes.verus\_G02619  
Pan troglodytes.verus\_G02629  
Pan troglodytes.verus\_G02627  
Pan troglodytes.verus\_G02645  
Pan troglodytes.verus\_G02628  
Pan troglodytes.verus\_G02620  
Pan troglodytes.verus\_G02632  
Pan troglodytes.verus\_G02621  
Pan troglodytes.verus\_G02617  
Pan troglodytes.verus\_G02623  
Pan troglodytes.verus\_G02638  
Pan troglodytes.verus\_G02615  
Pan troglodytes.verus\_G02653  
Pan troglodytes.verus\_G02641  
Pan troglodytes.verus\_G02642  
Pan troglodytes.verus\_G02622  
Pan troglodytes.verus\_G02634  
Pan troglodytes.verus\_G02612  
Pan troglodytes.verus\_G02611  
Pan troglodytes.verus\_G02652  
Pan troglodytes.verus\_G02636  
Pan troglodytes.verus\_G02624  
Pan troglodytes.verus\_G02649  
Pan troglodytes.verus\_G02616  
Pan troglodytes.verus\_G02648  
Pan troglodytes.verus\_G02626  
Pan troglodytes.verus\_G02643  
Pan troglodytes.verus\_G02651  
Pan troglodytes.verus\_G02608  
Pan troglodytes.verus\_G02646  
Pan troglodytes.verus\_G02631  
Pan troglodytes.verus\_G02630  
Pan troglodytes.verus\_G02614  
Pan troglodytes.schweinfurthi\_H07675  
Pan troglodytes.schweinfurthi\_H07649  
Pan troglodytes.schweinfurthi\_Pt1  
Pan troglodytes.schweinfurthi\_H07663  
Pan paniscus\_H07660  
Pan paniscus\_H07659  
Pan paniscus\_H07611  
Pan troglodytes.troglodytes\_H07689  
Pan troglodytes.schweinfurthi\_Pt11  
Gorilla.beringel.beringel\_H07627  
Gorilla.beringel.beringel\_H07626  
Pan troglodytes.schweinfurthi\_H07615  
Gorilla.beringel.beringel\_H07602  
Papio.cynocephalus\_SRR1747043  
Papio.cynocephalus\_SRR1747029  
Papio.cynocephalus\_SRR1747050  
Papio.cynocephalus\_SRR1747045  
Papio.cynocephalus\_SRR1747023  
Papio.cynocephalus\_SRR1747051  
Papio.cynocephalus\_SRR1747038  
Papio.cynocephalus\_SRR1747033  
Papio.cynocephalus\_SRR1747030  
Papio.cynocephalus\_SRR1747059  
Papio.cynocephalus\_SRR1747048  
Papio.cynocephalus\_SRR1747062  
Papio.cynocephalus\_SRR1747031  
Papio.cynocephalus\_SRR1747041  
Papio.cynocephalus\_SRR1747057  
Papio.cynocephalus\_SRR1747020  
Papio.cynocephalus\_SRR1747055  
Papio.cynocephalus\_SRR1747052  
Papio.cynocephalus\_SRR1747039  
Papio.cynocephalus\_SRR1747063  
Papio.cynocephalus\_SRR1747056  
Papio.cynocephalus\_SRR1747024  
Papio.cynocephalus\_SRR1747060  
Papio.cynocephalus\_SRR1747044  
Pan troglodytes.troglodytes\_H07688  
Pan troglodytes.troglodytes\_H07656  
Pan troglodytes.troglodytes\_H07685  
Papio.cynocephalus\_SRR1747064  
Papio.cynocephalus\_SRR1747049  
Papio.cynocephalus\_SRR1747047  
Homo.sapiens.sapiens\_H07623  
Gorilla.gorilla.gorilla\_H07678  
Theropithecus.gelada\_JB34  
Theropithecus.gelada\_JB27  
Theropithecus.gelada\_JB3  
Theropithecus.gelada\_JB29  
Theropithecus.gelada\_JB32  
Papio.arubis\_JB28  
Papio.arubis\_JB24  
Papio.arubis\_JB25  
Papio.arubis\_JB10  
Pan troglodytes.schweinfurthi\_Pt13  
Papio.cynocephalus\_SRR1747037  
Papio.cynocephalus\_SRR1747032  
Papio.cynocephalus\_SRR1747042  
Pan troglodytes.troglodytes\_H07658  
Gorilla.gorilla.gorilla\_Gor2  
Gorilla.gorilla.gorilla\_Gor11  
Pan troglodytes.verus\_G02644  
Homo.sapiens.sapiens\_H07687  
Homo.sapiens.sapiens\_H07686  
Homo.sapiens.sapiens\_H07638  
Homo.sapiens.sapiens\_H07634  
Homo.sapiens.sapiens\_H07641  
Homo.sapiens.sapiens\_H07622  
Homo.sapiens.sapiens\_H07603  
Homo.sapiens.sapiens\_H07625  
Homo.sapiens.sapiens\_H07632  
Homo.sapiens.sapiens\_H07642  
Homo.sapiens.sapiens\_H07621  
Homo.sapiens.sapiens\_H07643  
Homo.sapiens.sapiens\_H07604  
Homo.sapiens.sapiens\_H07628  
Homo.sapiens.sapiens\_H07664  
Homo.sapiens.sapiens\_H07610  
Homo.sapiens.sapiens\_E07148  
Homo.sapiens.sapiens\_E07196  
Homo.sapiens.sapiens\_E07190  
Homo.sapiens.sapiens\_E07192  
Homo.sapiens.sapiens\_E07175  
Homo.sapiens.sapiens\_E07145  
Homo.sapiens.sapiens\_H07599  
Homo.sapiens.sapiens\_H07597  
Homo.sapiens.sapiens\_H07598  
Homo.sapiens.sapiens\_E07193  
Homo.sapiens.sapiens\_E07160  
Homo.sapiens.sapiens\_H07640  
Homo.sapiens.sapiens\_H07620  
Homo.sapiens.sapiens\_H07644  
Homo.sapiens.sapiens\_H07618  
Homo.sapiens.sapiens\_E07189  
Homo.sapiens.sapiens\_E07147  
Homo.sapiens.sapiens\_H07146  
Homo.sapiens.sapiens\_E07182  
Homo.sapiens.sapiens\_E07139  
Homo.sapiens.sapiens\_H07690  
Homo.sapiens.sapiens\_E07154  
Homo.sapiens.sapiens\_E07188  
Homo.sapiens.sapiens\_E07184  
Homo.sapiens.sapiens\_E07183  
Homo.sapiens.sapiens\_E07180  
Homo.sapiens.sapiens\_E07152  
Homo.sapiens.sapiens\_E07150  
Homo.sapiens.sapiens\_H07629  
Homo.sapiens.sapiens\_E07178  
Homo.sapiens.sapiens\_H07639  
Homo.sapiens.sapiens\_E07187  
Homo.sapiens.sapiens\_E07172  
Homo.sapiens.sapiens\_E07197  
Homo.sapiens.sapiens\_H07630  
Colobus.guereza\_BWC2026  
Colobus.guereza\_BWC2023  
Colobus.guereza\_BWC2115  
Gorilla.gorilla.gorilla\_H07650  
Gorilla.gorilla.gorilla\_H07613  
Gorilla.gorilla.gorilla\_H07652  
Gorilla.gorilla.gorilla\_H07605  
Gorilla.gorilla.gorilla\_Gor3  
Gorilla.gorilla.gorilla\_H07662  
Gorilla.beringel.beringel\_H07685  
Gorilla.gorilla.gorilla\_H07614  
Gorilla.gorilla.gorilla\_H07651  
Gorilla.gorilla.gorilla\_Gor12  
Gorilla.gorilla.gorilla\_Gor1  
Papio.cynocephalus\_SRR1747035  
Gorilla.beringel.beringel\_H07684  
Lemur.catta\_Lc308  
Lemur.catta\_Lc307  
Lemur.catta\_Lc310  
Eulemur.rubriventer\_ERUB105M  
Eulemur.rubriventer\_ERUB102M  
Eulemur.rubriventer\_ERUB10M  
Eulemur.rubriventer\_ERUB12M  
Lemur.catta\_Lc301  
Lemur.catta\_Lc259  
Propithecus.verreauxi\_PVPet  
Propithecus.verreauxi\_PVQui  
Propithecus.verreauxi\_PVAbb  
Propithecus.verreauxi\_PVLow  
Ateles.belzebuth\_AtbelzLink4  
Ateles.belzebuth\_AtbelzLink2  
Ateles.belzebuth\_AtbelzLink3  
Ateles.hybridus\_Ahyb411  
Ateles.belzebuth\_AtbelzLink1  
Pan troglodytes.troglodytes\_H07657  
Pan troglodytes.troglodytes\_H07608  
Pan troglodytes.troglodytes\_H07612  
Pan troglodytes.schweinfurthi\_H07679  
Pan troglodytes.troglodytes\_H07679  
Pan troglodytes.verus\_G02654
